# Supplementary material for: Sulfated glycans engage the Ang–Tie pathway to regulate vascular development
Source: Springer Nature journal article supplement (doi:10.1038/s41589-020-00657-7), 2020-10-05
Supplement: MOESM1 [file 41589_2020_657_MOESM1_ESM.pdf]

---

**Supplementary information**

---

**Sulfated glycans engage the Ang–Tie  
pathway to regulate vascular development**

---

In the format provided by the  
authors and unedited

## Supplementary Information

### **Sulfated glycans engage the Ang/Tie pathway to regulate vascular development**

5 Matthew E. Griffin<sup>1</sup>, Alexander W. Sorum<sup>1,3</sup>, Gregory M. Miller<sup>1,3</sup>, William A. Goddard III<sup>1,2</sup>,  
Linda C. Hsieh-Wilson<sup>1\*</sup>

<sup>1</sup>Division of Chemistry and Chemical Engineering, California Institute of Technology, Pasadena,  
CA 91125, USA.

10 <sup>2</sup>Materials and Process Simulation Center and Joint Center for Artificial Photosynthesis,  
California Institute of Technology, Pasadena, CA 91125, USA.

<sup>3</sup>These authors contributed equally to this work.

\*Correspondence to: [lhw@caltech.edu](mailto:lhw@caltech.edu).

Contents:

15 Supplementary Figures 1-4

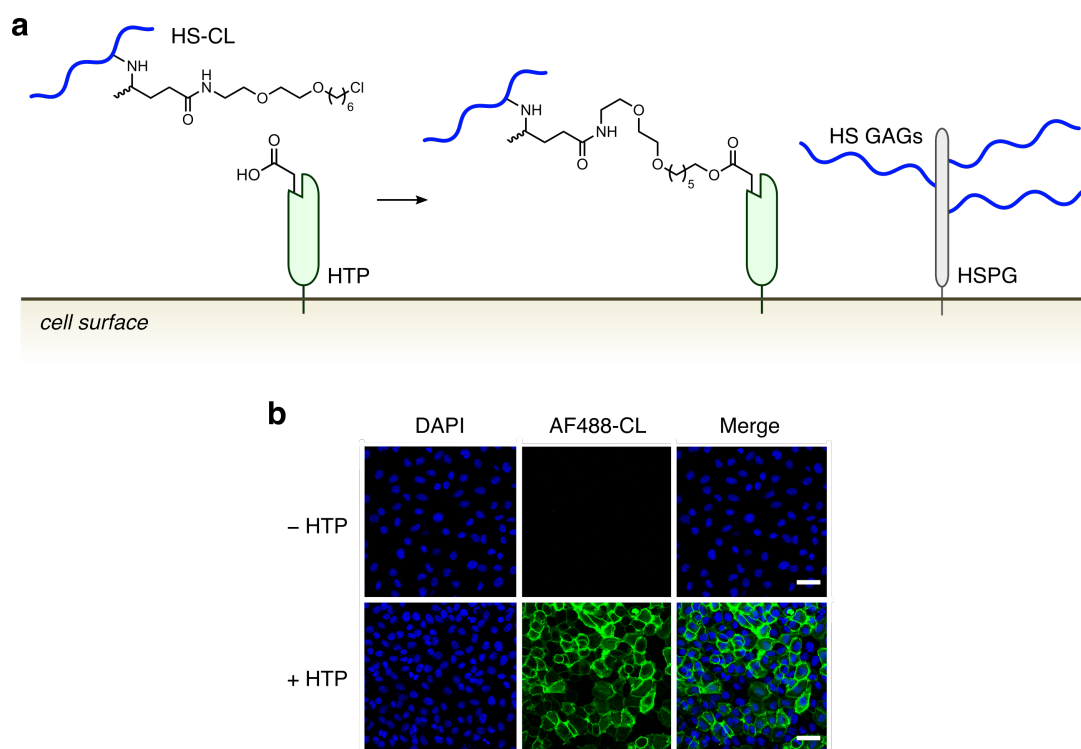

### Supplementary Figure 1. HTP-mediated cell-surface engineering of endothelial cells with

**HS GAGs.** (a) HTP is a modified alkane dehalogenase fused to the transmembrane domain of PDGFR. A catalytic Asp residue of the transmembrane HTP construct will covalently attach to

5 biomolecules that are functionalized with the chlorohexyl linker (CL) such as HS-CL, which allows for stable cell-surface display of HS structures of interest and mimics naturally occurring HSPGs. (b) An EA.hy926 cell line stably expressing the HTP (+HTP) and the parental EA.hy926 cell line (-HTP) were treated with a cell-impermeable, CL-conjugated Alexa Fluor 488 (AF488-

10 CL, green), and nuclei were co-stained with Hoescht 33342 (blue). The EA.hy926-HTP cell line showed robust, specific labeling by AF488-CL, confirming the expression and cell-surface trafficking of the HTP and successful labeling of the cell surface with CL-conjugated cargo.

Scale bar = 50  $\mu$ m. Images are representative of 3 biologically independent samples.

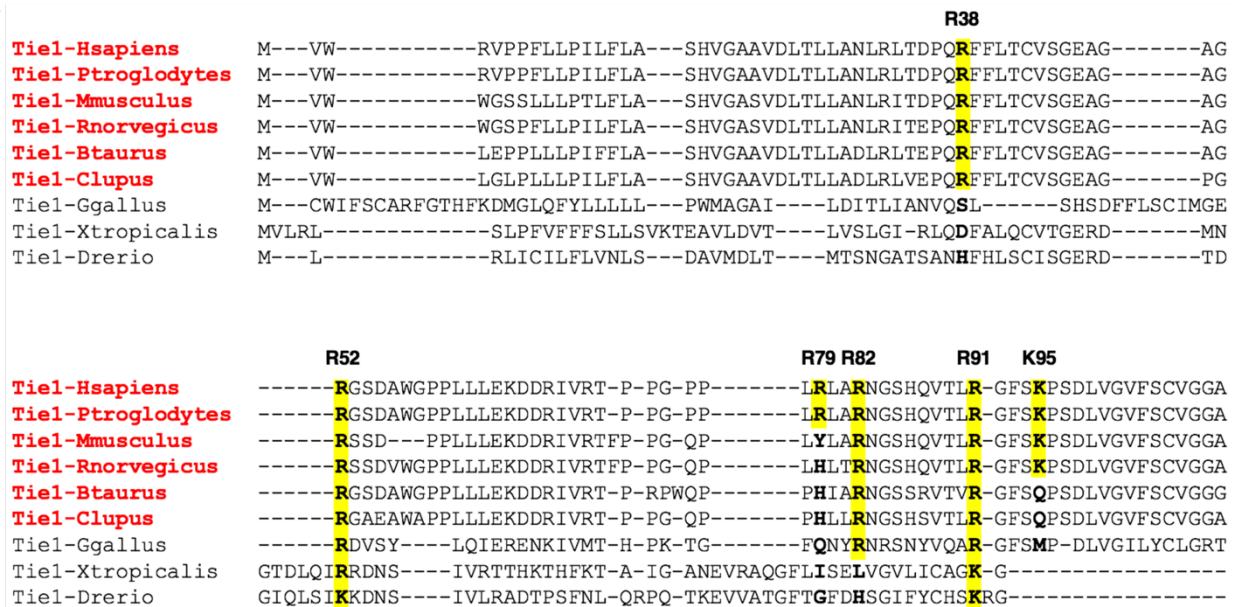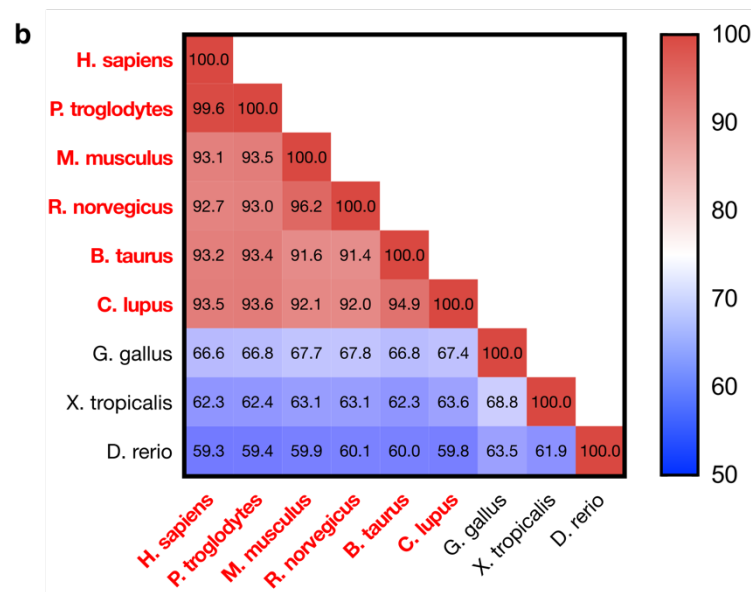

**Supplementary Figure 2. Electropositive residues on Tie1 involved in GAG binding are conserved across mammals.** (a) Sequence alignment and (b) percent sequence identity of Tie1 orthologs across chordates predicted by HomoloGene. Alignments were generated using MUSCLE version 3.6. Mammalian species are shown in red, predicted GAG-binding residues are shown in bold, and conserved residues are highlighted in yellow.

5

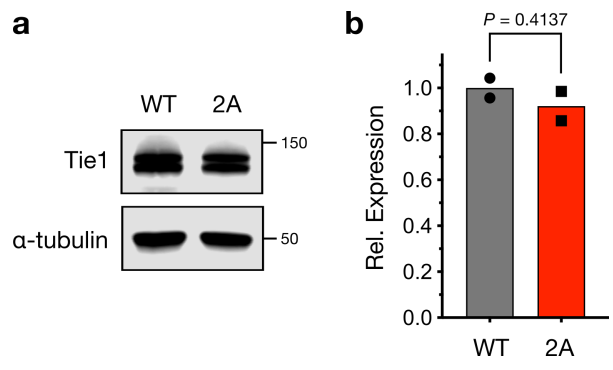

**Supplementary Figure 3. The 2A mutation does not affect Tie1 expression levels in cultured cells.** (a) Representative Western blotting and (b) quantification of full-length Tie1-WT and Tie1-2A expression levels after transient over-expression in HEK-293T cells. Data represent mean and individual datapoints,  $n = 2$ , unpaired, two-tailed Student's  $t$  test.

10

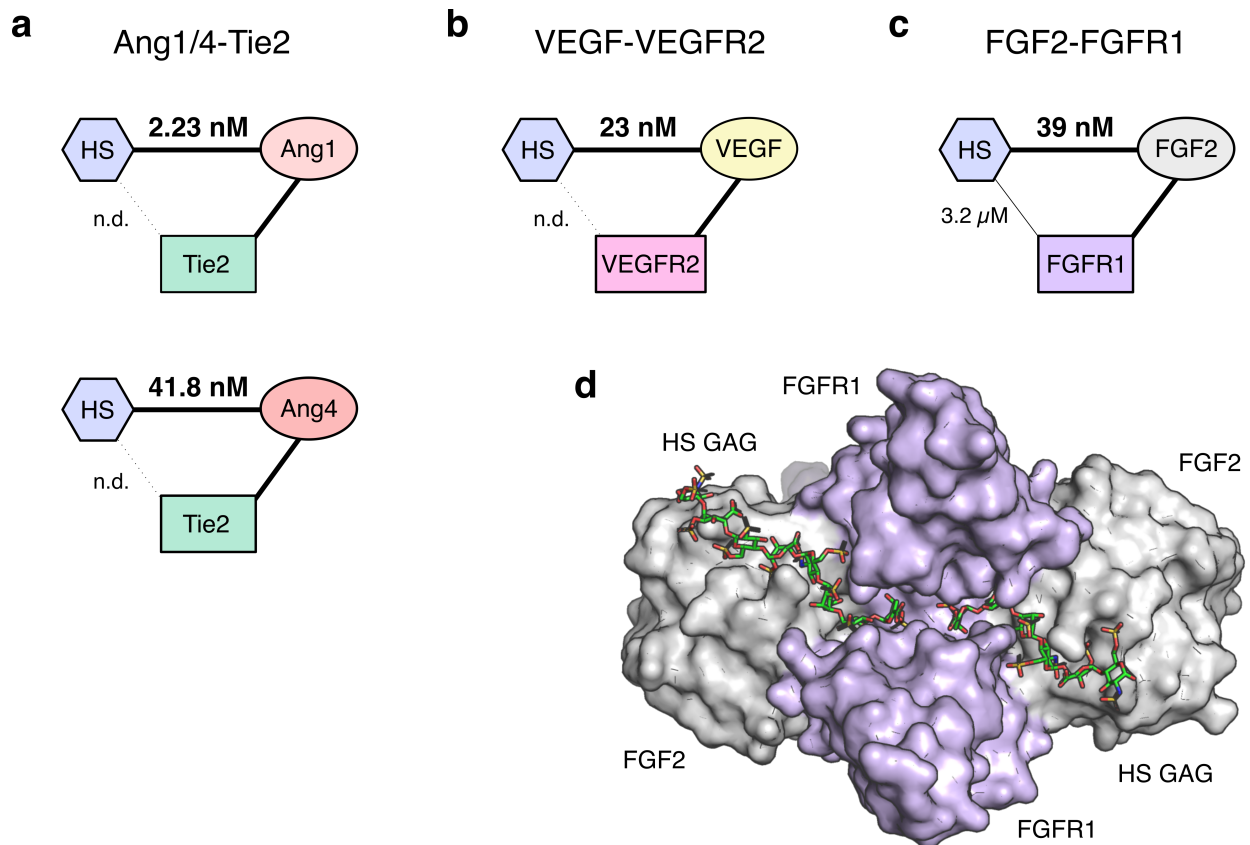

**Supplementary Figure 4. Comparison of HS-ligand-receptor signaling complexes.** The HS-

Ang1/4-Tie2 complex shares similarities to both the HS-VEGF-VEGFR2 and HS-FGF2-FGFR1 complexes. (a) HS binds with nanomolar affinity to Ang1/4 (2.23 and 41.8 nM, respectively), similar to the reported affinities of HS for (b) VEGF (23 nM)<sup>37</sup> and (c) FGF2 (39 nM).<sup>45</sup> No interaction between HS and Tie2 was observed by ELISA or glycan microarrays, similar to the lack of reported interaction between HS and VEGFR2<sup>37</sup> and the weak interaction (3.2 μM) reported between HS and FGFR1.<sup>45</sup> n.d. = not detected. (d) Crystal structure of the HS-FGF2-FGFR1 complex determined by Schlessinger *et al.*<sup>16</sup> HS binds in a continuous groove and makes contacts with both FGF2 (light gray) and FGFR1 (purple), despite weak interactions with FGFR1.
