# Supplementary material for: Sulfated glycans engage the Ang–Tie pathway to regulate vascular development
Source: Springer Nature journal article supplement (doi:10.1038/s41589-020-00657-7), 2020-10-05
Supplement: MOESM5 [file 41589_2020_657_MOESM5_ESM.xlsx]

## Sheet: 2B
Control	Ang1	Ang1/Hep
3.17003	24.1259	12.875
4.85564	23.7366	11.5976
5.46624	24.8038	10.3832

## Sheet: 2D
Blue box demarks the cropped area in the figure. The Bio-Rad dual color protein ladder is shown on the left.

## Sheet: 2E
	de-N,O-HS-CL			HS-CL
Untreated	1	1	1	1.1691	1.11727	1.28391
Ang1	2.06964	2.2459	2.32907	2.92459	3.09975	3.44783
Ang2	1.46178	0.760404	1.67752	1.66284	1.36255	1.76225
Ang4	4.04345	4.4895	4.0382	5.13398	5.4582	6.01165
