# Supplementary material for: Sulfated glycans engage the Ang–Tie pathway to regulate vascular development
Source: Springer Nature journal article supplement (doi:10.1038/s41589-020-00657-7), 2020-10-05
Supplement: MOESM15 [file 41589_2020_657_MOESM15_ESM.xlsx]

## Sheet: 7A
Pose	Coulombic	H-bonding	van der Waals
1	-1048.22	-32.855	1.078
2	-1036.69	-28.168	16.454
3	-1024.35	-34.164	22.751
4	-1025.53	-29.017	-8.787
5	-1049.6	-33.505	11.041
6	-1042.05	-22.779	9.82
7	-1030.69	-25.366	-1.312
8	-1029.88	-37.552	13.062
9	-1027.48	-31.759	23.065
10	-992.524	-37.715	23.115

## Sheet: 7B
Blue box demarks the cropped area in the figure. The Bio-Rad dual color protein ladder is shown on the left.
