# Supplementary material for: Sulfated glycans engage the Ang–Tie pathway to regulate vascular development
Source: Springer Nature journal article supplement (doi:10.1038/s41589-020-00657-7), 2020-10-05
Supplement: MOESM17 [file 41589_2020_657_MOESM17_ESM.xlsx]

## Sheet: 10A
Blue box demarks the cropped area in the figure. Dotted line denotes two separate gels that were transferred onto the same blot membrane. The Bio-Rad dual color protein ladder is shown on the left.

## Sheet: 10B
Tie1-WT	Tie1-2A
1.00991	0.843687
0.941074	0.916208
0.889036	1.01179
1.06119	0.997128
1.1139	0.878487
0.984887	1.03491
